# Supplementary material for: Whole Genome Resequencing Revealed the Effect of Helicase yqhH Gene on Regulating Bacillus thuringiensis LLP29 against Ultraviolet Radiation Stress
Source: MDPI journal article supplement (doi:10.3390/ijms24065810), 2023-03-18
Supplement: s1 [file s1]

## Supplemental Figures and Tables

**Table S1.** Comparison statistics with reference genome Bt LLP29.

| Sample    | Total-Reads | Mapped (%) | Properly-Mapped (%) |
|-----------|-------------|------------|---------------------|
| LLP29-M19 | 14,602,840  | 98.45      | 98.04               |

Total-Reads: The number of Clean Reads; Mapped (%): The percentage of Clean Reads mapped to the reference genome in all Clean Reads; Properly-mapped (%): The paired-end sequencing sequences are mapped to the reference genome and the distance conforms to the length distribution of sequencing fragments.

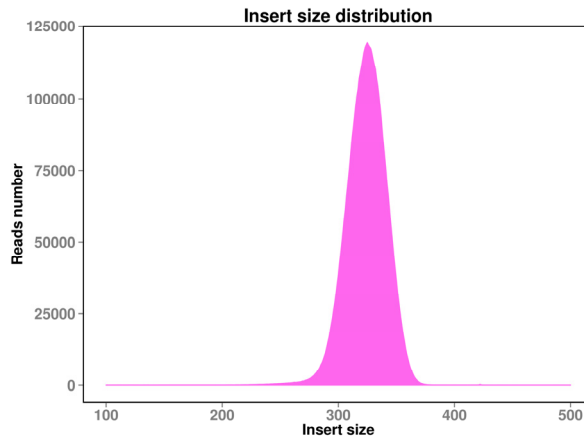

**Figure S1.** Distribution of Bt LLP29-M19 inserts. The abscissa is the length of the inserted fragment, and the ordinate is the number of corresponding reads.

**Table S2.** Statistics of SNPs detected by Bt LLP29-M29 and the reference genome.

| SNP Number | Transition | Transversion | Ti/Tv | Heterozygosity | Homozygosity | Het-Ratio |
|------------|------------|--------------|-------|----------------|--------------|-----------|
| 1318       | 889        | 429          | 2.07  | 1085           | 233          | 0.17%     |

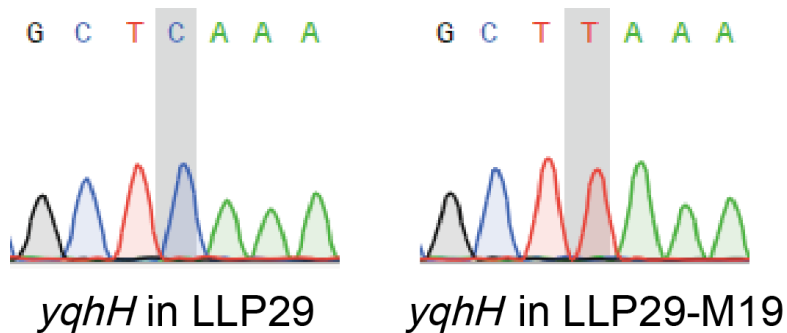

**Figure S2.** Sequence alignment of *yqhH* gene.

**Table S3.** Primers for vector construction, knockout and complementation, and validation of helicase activity.

|                 |                                                |
|-----------------|------------------------------------------------|
| <i>yqhH</i> -F  | CGGGATCCATGAATGTCGATATTTCCGTAGATCG             |
| <i>yqhH</i> -R  | GGAATTCATGTTGCTGCATAGCCTTGC                    |
| 5'H-A           | H-GCACTGGCCGTCGTTTTACGGTCGTGACTGGGAAAACCCTGGCG |
| 3'F-B           | TTTTTTTTTTTTTTTTTTTTTCCAAGTAAAACGACGGCCAGTGC-F |
| <i>yqhH</i> -A1 | CTAGAAGCTTCTGCAGACGCGTCGACGCTCCTTCTAAAGCAGAAGG |
| <i>yqhH</i> -A2 | CACCTCAAATGGTTCGCTGCAAGAAATTTTCGCGCAATC        |

|                    |                                                 |
|--------------------|-------------------------------------------------|
| <i>yqhH</i> -B1    | GAGCGCCTACGAGGAATTTTCGATCTACGGAAATATCGAC        |
| <i>yqhH</i> -B2    | GCCTCGCGTCGGGCGATATCGGATCCCATGACTTGCTAACCATTCCG |
| <i>yqhH</i> -K1    | GATTGCGCGAAAATTTCTTGCAGCGAACCATTGAGGTG          |
| <i>yqhH</i> -K2    | GTCGATATTTCCGTAGATCGAAATTCCTCGTAGGCGCTC         |
| <i>yqhH</i> -F1    | ATGTGAGCGAGTAAGAGTGG                            |
| <i>yqhH</i> -R1    | GATGGAGTGAAAGAGCCT                              |
| <i>yqhH</i> -F2    | TGAAACCCAGGACAATAA                              |
| <i>yqhH</i> -R2    | CCTCTTCTGCTCCAACTTCA                            |
| <i>yqhH</i> -R-F1* | TGTGAGCGAGTAAGAGTGCC                            |
| <i>yqhH</i> -R-R1* | GAATGGTAAAGCGATTCTAGC                           |
| <i>yqhH</i> -R-F2* | GAACAGGAGTAGCGGTTAGT                            |
| <i>yqhH</i> -R-R2* | CGAAAGATTCCACACATTCA                            |

F: fluorescein, H: hexachlorofluorescein.
